# Supplementary material
Source: PubMed Central journal article supplement (PMC8201941)
Supplement: pnas.2022239118.sapp.pdf [file pnas.2022239118.sapp.pdf]

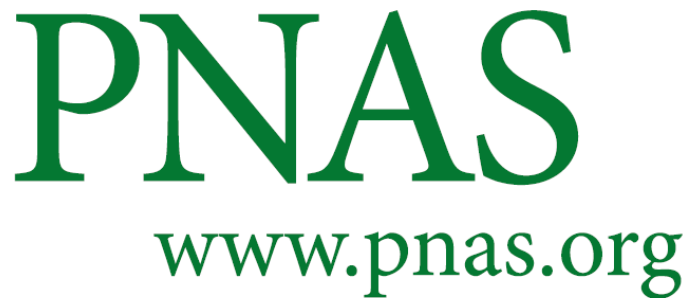

## Supplementary Information for

The Persistent Threat of Emerging Plant Disease Pandemics to Global Food Security.

### *Authors:*

Jean B. Ristaino<sup>1</sup>, Pamela Anderson<sup>2</sup>, Dan Bebber<sup>3</sup>, Kate A. Brauman<sup>4</sup>, Nik J. Cunniffe<sup>5</sup>, Nina Fedoroff<sup>6</sup>, Cambria Finegold<sup>7</sup>, Karen A. Garrett<sup>8</sup>, Christopher A. Gilligan<sup>9</sup>, Christopher Jones<sup>10</sup>, Michael Martin<sup>11</sup>, Graham K. MacDonald<sup>12</sup>, Patricia Neenan<sup>13</sup>, Angela Records<sup>14</sup>, David Schmale<sup>15</sup>, Laura Tateosian<sup>16</sup>, Qingshan Wei<sup>17</sup>

### *Affiliations:*

<sup>1</sup> William Neal Reynolds Distinguished Professor, Emerging Plant Disease and Global Food Security Cluster; Department of Entomology and Plant Pathology, Director, Emerging Plant Disease and Global Food Security Cluster, NC State University, Raleigh, NC, 27695.

<sup>2</sup> Emeritus Director General, International Potato Center, 1558, Lima, Peru, Board for International Food and Agricultural Development, United States Agency for International Development, Washington DC 20523.

<sup>3</sup> Senior Lecturer, Biosciences, Exeter University, EX4 4QD, United Kingdom.

<sup>4</sup> Lead Scientist, Global Water Initiative, Institute on the Environment, University of Minnesota, St Paul, MN, 55108 and American Association for the Advance of Science Fellow, Washington DC, 20008

<sup>5</sup> University Senior Lecturer in Mathematical Biology, Department of Plant Sciences, Cambridge University, CB2 3EA, United Kingdom.

<sup>6</sup> Emeritus Evan Pugh Professor, Huck Institute of Life Sciences, Penn State University, University Park, PA, 16801.

<sup>7</sup> Global Director, Digital Development, CABI, Wallingford, OX10 8DE, United Kingdom

<sup>8</sup> Preeminence Professor, Institute for Sustainable Food Systems and Plant Pathology Department, University of Florida, Gainesville, FL, 32611.

<sup>9</sup> Professor of Mathematical Biology, Epidemiology and Modeling Group, Department of Plant Sciences, University of Cambridge, CB2 3EA, United Kingdom.

<sup>10</sup> Research Associate, Center for Geospatial Analytics, NC State University, Raleigh NC, 27695.

<sup>11</sup> Associate Professor, Department of Natural History, NTNU University Museum, Norwegian University of Science and Technology (NTNU), 7491, Trondheim, Norway

<sup>12</sup> Assistant Professor, Department of Geography, McGill University, Montreal, QC, H3A OB9, Canada,

<sup>13</sup> Head of Strategic Partnerships, the Americas, CABI, OX10 8DE, United Kingdom.

<sup>14</sup> International Agriculture Research Advisor, Bureau for Food Security, United States Agency for International Development, Washington DC 20523.

<sup>15</sup> School of Plant and Environmental Sciences, Virginia Tech, Blacksburg, VA

<sup>16</sup> Teaching Associate Professor, Center for Geospatial Analytics, NC State University, Raleigh, NC, 27695

<sup>17</sup> Emerging Plant Disease and Global Food Security Cluster; Department of Chemical and Biomolecular Engineering, NC State University, Raleigh, NC, 27695

*Corresponding author:* Jean Ristaino, Box 7613 Department of Entomology and Plant Pathology, NC State University, Raleigh, NC 27695. 919 515-3257, Jbr@ncsu.edu

**This PDF file includes:**

Figures S1 to S2

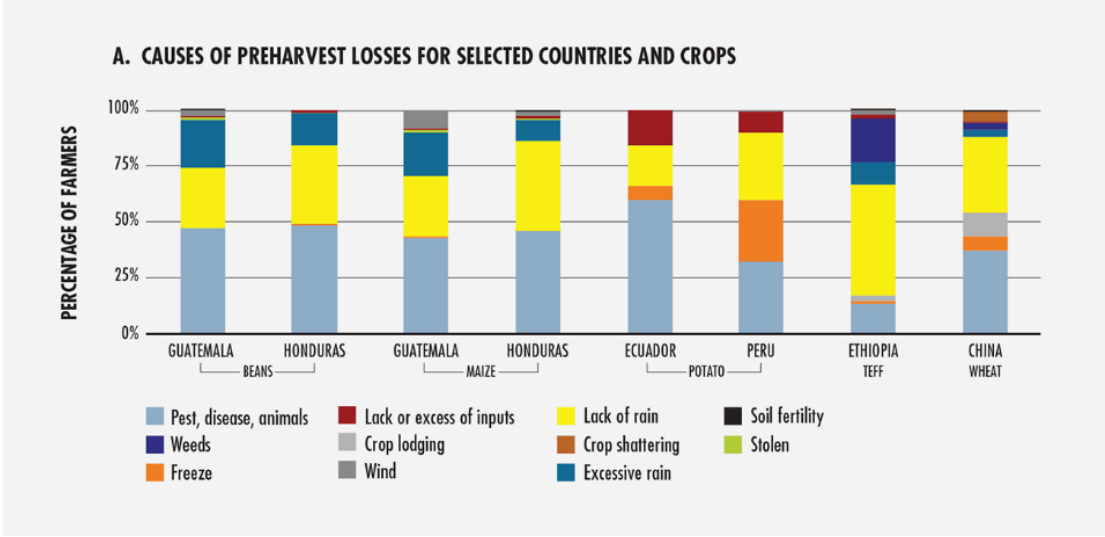

**Fig. S1.** The nature and causes of losses for five staple crops in, Guatemala, Honduras, Ecuador, Peru, Ethiopia and China. The percentage of farmers experiencing loss due to plant diseases and pests were identified as a major cause of preharvest loss across 5 of 61 countries and sectors examined. Image credit: Food and Agriculture Organization of the United Nations, SI ref. 1. Reproduced with permission.

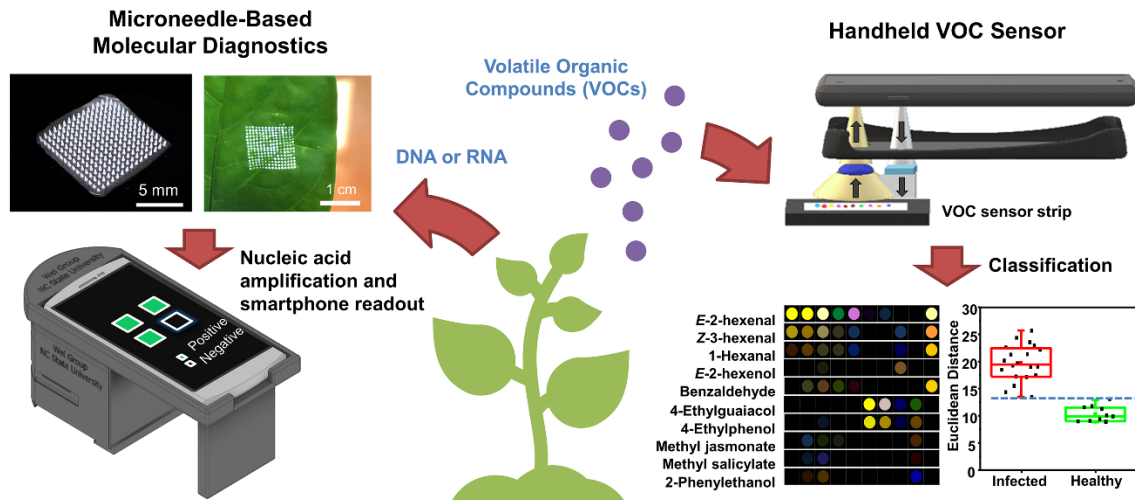

**Fig. S2.** Overview of two smartphone-based imaging platforms for plant disease detection. Schematic on the left is a molecular diagnostic platform based on microneedle (MN) patch nucleic acid extraction and a smartphone-based LAMP assay. Schematic on the right is a smartphone device for sensor array scanning and image capture of colorimetric volatile organic compound (VOC) sensor. The sensor cartridge containing the chemical sensor array is photographed and differential profiles of 10 representative plant volatiles are detected. Healthy and diseased plants were distinguished using the VOC sensor array. Ref 2

## SI References

1. Food and Agriculture Organization of the United Nations, The State of Food and Agriculture 2019. Moving forward on food loss and waste reduction. (Food and Agricultural Organization, Rome Italy, 2019).
2. R. Paul, E. Ostermann, Y. Chen, A. C. Saville, Y. Yang, Z. Gu., A. E. Whitfield, J. B. Ristaino, Q. Wei. Q. 2021. Integrated Microneedle-Smartphone Nucleic Acid Amplification Platform for In-Field Diagnosis of Plant Diseases. Biosensors and Bioelectronics: accepted
